# Supplementary material for: Transcription factor binding sites are frequently under accelerated evolution in primates
Source: PubMed Central journal article supplement (PMC9922303; doi:10.1038/s41467-023-36421-3), 2023-02-11
Supplement: 41467_2023_36421_MOESM1_ESM.pdf [file 41467_2023_36421_MOESM1_ESM.pdf]

## **Supplementary material for:**

# **Transcription factor binding sites are frequently under accelerated evolution in primates**

Xinru Zhang<sup>1,2,3\*</sup>, Bohao Fang<sup>4</sup> and Yi-Fei Huang<sup>1,2\*</sup>

<sup>1</sup>Department of Biology, Pennsylvania State University,

University Park, PA 16802, USA

<sup>2</sup>Huck Institutes of the Life Sciences, Pennsylvania State University,

University Park, PA 16802, USA

<sup>3</sup>Bioinformatics and Genomics Graduate Program, Pennsylvania State University,

University Park, PA 16802, USA

<sup>4</sup>Department of Organismic and Evolutionary Biology and the Museum of Comparative Zoology, Harvard University, Boston, MA 02135, USA

\*Correspondence: yuh371@psu.edu and xmz5176@psu.edu

Supplementary Table 1: Non-overlapping TFBS groups under accelerated evolution.  $r_1$  and  $r_2$  are the relative substitution rates of a TFBS group in the human lineage and in other primates.  $P$ -values are calculated from likelihood ratio test. The ratio ( $r_1/r_2$ ) indicates the fold of increase in substitution rate in the human lineage.

| Genomic elements        | $r_1$ | $r_2$ | $P$ -value | $r_1/r_2$ |
|-------------------------|-------|-------|------------|-----------|
| Pol III binding         | 2.30  | 1.41  | 0          | 1.63      |
| BDP1                    | 1.34  | 1.12  | 1.41E-06   | 1.19      |
| POU5F1-NANOG<br>binding | 0.91  | 0.83  | 0.002      | 1.10      |
| POU5F1                  | 1.03  | 0.94  | 1.5E-05    | 1.09      |
| FOXP2                   | 0.99  | 0.92  | 0          | 1.08      |
| NANOG                   | 0.90  | 0.85  | 0.004      | 1.05      |
| NRF1                    | 1.16  | 1.11  | 0.03       | 1.05      |

Supplementary Table 2: Relative BICs for different foreground lineages.

| Model | Foreground lineage | Pol III binding | BDP1   | POU5F1-NANOG binding | POU5F1 | FOXP2  | NANOG | NRF1  |
|-------|--------------------|-----------------|--------|----------------------|--------|--------|-------|-------|
| M1    | Human              | 158.29          | 23.27  | 9.82                 | 18.74  | 141.34 | 8.24  | 4.79  |
| M2    | Hominini           | 530.38          | 35.65  | 24.47                | 36.96  | 199.91 | 16.67 | 30.24 |
| M3    | Homininae          | 1060.78         | 40.06  | 24.11                | 23.77  | 211.00 | 10.36 | 33.54 |
| M4    | Hominidae          | 1590.02         | 65.20  | 15.94                | 17.96  | 320.93 | 20.07 | 46.08 |
| M5    | Caterrhini         | 1973.45         | 113.72 | 8.81                 | 36.88  | 186.56 | 13.15 | 47.28 |
| M6    | Simiiformes        | 1110.76         | 58.78  | 2.09                 | 20.54  | 28.66  | 0.13  | 6.30  |
| M7    | Haplorhini         | 0               | 0      | 0                    | 0      | 0      | 0     | 0     |

Supplementary Table 3: Rates of adaptive substitutions estimated by the INSIGHT model.  $D_p$  indicates the expected number of divergences per kilobase driven by positive selection in the human lineage.  $SE[D_p]$  is the standard error of  $D_p$ .  $P$ -values are calculated from the one-sided Wald test.

| Genomic elements     | $D_p$ | $SE[D_p]$ | $P$ -value |
|----------------------|-------|-----------|------------|
| HARs                 | 7.67  | 0.14      | < 0.0001   |
| Pol III binding      | 7.28  | 0.59      | < 0.0001   |
| BDP1                 | 0.60  | 0.35      | 0.40       |
| POU5F1-NANOG binding | 0     | 0         |            |
| POU5F1               | 0     | 0         |            |
| FOXP2                | 0     | 0         |            |
| NANOG                | 0     | 0         |            |
| NRF1                 | 0.27  | 0.26      | 0.15       |

Supplementary Table 4: Estimates and confidence Intervals from the mixture model.

| Genomic elements     | $1 - \hat{\pi}_{ub}$ | 95%CI of $1 - \pi_{ub}$ | $\hat{a}$ | 95%CI of $a$ | $\hat{\lambda}$ | 95%CI of $\lambda$ |
|----------------------|----------------------|-------------------------|-----------|--------------|-----------------|--------------------|
| PoI III binding      | 0.78                 | (0.74, 0.81)            | 0.22      | (0.19, 0.26) | 8.0E-6          | (3.06E-7, 3.42E-5) |
| BDP1                 | 0.20                 | (0.18, 0.24)            | 0.30      | (0.22, 0.37) | 0.71            | (0.71, 0.72)       |
| POU5F1-NANOG binding | 0.08                 | (0.04, 0.11)            | 0.43      | (0.30, 0.66) | 0.86            | (0.65, 0.94)       |
| POU5F1               | 0.10                 | (0.07, 0.15)            | 0.38      | (0.35, 0.47) | 0.83            | (0.71, 0.89 )      |
| FOXP2                | 0.27                 | (0.25, 0.29)            | 0.52      | (0.51, 0.54) | 0.43            | (0.37, 0.49)       |
| NANOG                | 0.26                 | (0.23, 0.29)            | 0.55      | (0.47, 0.55) | 0.42            | (0.37, 0.56)       |
| NRF1                 | 0.25                 | (0.22, 0.29)            | 0.45      | (0.41, 0.52) | 0.54            | (0.38, 0.54)       |

Supplementary Table 5: Group-level LRT estimates on ChIP-seq peaks of histone modifications.  $r_1$  and  $r_2$  are the relative substitution rates of a collection of ChIP-seq peaks in the human lineage and in other primates. The ratio ( $r_1/r_2$ ) indicates the fold of increase in substitution rate in the human lineage.  $P$ -values are calculated from two-sided likelihood ratio test.

| Species        | Regions  | Tissue | Fold of increase<br>in substitution<br>rate( $r_1/r_2$ ) | $P$ -value |
|----------------|----------|--------|----------------------------------------------------------|------------|
| Rhesus macaque | promoter | liver  | 0.95                                                     | 0          |
| Rhesus macaque | enhancer | liver  | 1.00                                                     | 0.04       |
| Human          | promoter | liver  | 0.92                                                     | 0          |
| Human          | enhancer | liver  | 0.98                                                     | 0          |
| Rhesus macaque | CRE      | brain  | 0.97                                                     | 0          |
| Chimpanzee     | CRE      | brain  | 1.04                                                     | 0          |
| Human          | CRE      | brain  | 1.05                                                     | 0          |
